# Supplementary material for: Catalytic coupling of CO2 with epoxide by metal macrocycles functionalized with imidazolium bromide: insights into the mechanism and activity regulation from density functional calculations
Source: Royal Society of Chemistry journal article supplement (doi:10.1039/c8dt04684k), 2018-12-18
Supplement: c8dt04684k1.pdf [file c8dt04684k1.pdf]

# Electronic Supplementary Information for

## Catalytic Coupling of CO<sub>2</sub> with Epoxide by the Ionic Liquid Modified Metal Macrocycles: Insight into Mechanism and Activity Regulation from Density functional Calculations

Ping Li and Zexing Cao\*

State Key Laboratory of Physical Chemistry of Solid Surfaces, Fujian Provincial Key Laboratory of Theoretical and Computational Chemistry, and College of Chemistry and Chemical Engineering, Xiamen University, Xiamen 360015, China

E-mail: [zxcao@xmu.edu.cn](mailto:zxcao@xmu.edu.cn); Fax: (+86) 592-218-3047; Tel: (+86) 592-218-6081

### Table of Contents

**Fig. S1** Optimized structures (bonds in Å) of species for the cycloaddition reaction of CO<sub>2</sub> and PO catalyzed by IL-Zn(TPP) and the Zn as the catalytic center.

**Fig. S2** Predicted relative free energy profile and electronic energies (in parentheses) for the cycloaddition reaction of CO<sub>2</sub> and PO catalyzed by IL-Zn(TPP) and the imidazole as the catalytic center.

**Fig. S3** Optimized structures (bonds in Å) of species for the cycloaddition reaction of CO<sub>2</sub> and PO catalyzed by IL-Zn(TPP) and the imidazole as the catalytic center.

**Fig. S4** Optimized structures (bonds in Å) of species for the cycloaddition reaction of CO<sub>2</sub> and PO catalyzed by IL-Zn(TPP) and the COOH group as the catalytic center.

**Fig. S5** Predicted relative free energy profile and electronic energies (in parentheses) for the cycloaddition reaction of CO<sub>2</sub> and PO catalyzed by the metalloporphyrin moiety of COOH-IL-Zn(TPP).

**Fig. S6** Optimized structures (bonds in Å) of species for the catalytic cycloaddition reaction of CO<sub>2</sub> and PO by COOH-IL-Zn(TPP).

**Fig. S7** Predicted relative free energy profile and electronic energies (in parentheses) for the catalytic cycloaddition reaction of CO<sub>2</sub> and PO by COOH-IL-Mg(TPP).

**Fig. S8** Optimized structures (bonds in Å) of species for the catalytic cycloaddition reaction of CO<sub>2</sub> and PO by COOH-IL-Mg(TPP).

**Fig. S9** Optimized structures (bonds in Å) of species involved in the catalytic cycloaddition reaction of CO<sub>2</sub> and PO by the IL moiety of IL-Al(Cor).

**Fig. S10** Optimized structures (bonds in Å) of species for the catalytic cycloaddition reaction of CO<sub>2</sub> and PO by COOH- IL-Al(Cor).

**Fig. S11** Predicted relative free energy profile and electronic energies (in parentheses) for the catalytic cycloaddition reaction of CO<sub>2</sub> and PO by the IL moiety of COOH-IL-Al(Cor).

**Fig. S12** Optimized structures (bonds in Å) of species for the catalytic cycloaddition reaction of CO<sub>2</sub> and PO by the IL moiety of OH- IL-Al(Cor).

**Fig. S13** Predicted relative free energy profile and electronic energies (in parentheses) for the catalytic cycloaddition reaction of CO<sub>2</sub> and PO by the IL moiety of OH-IL-Al(Cor).

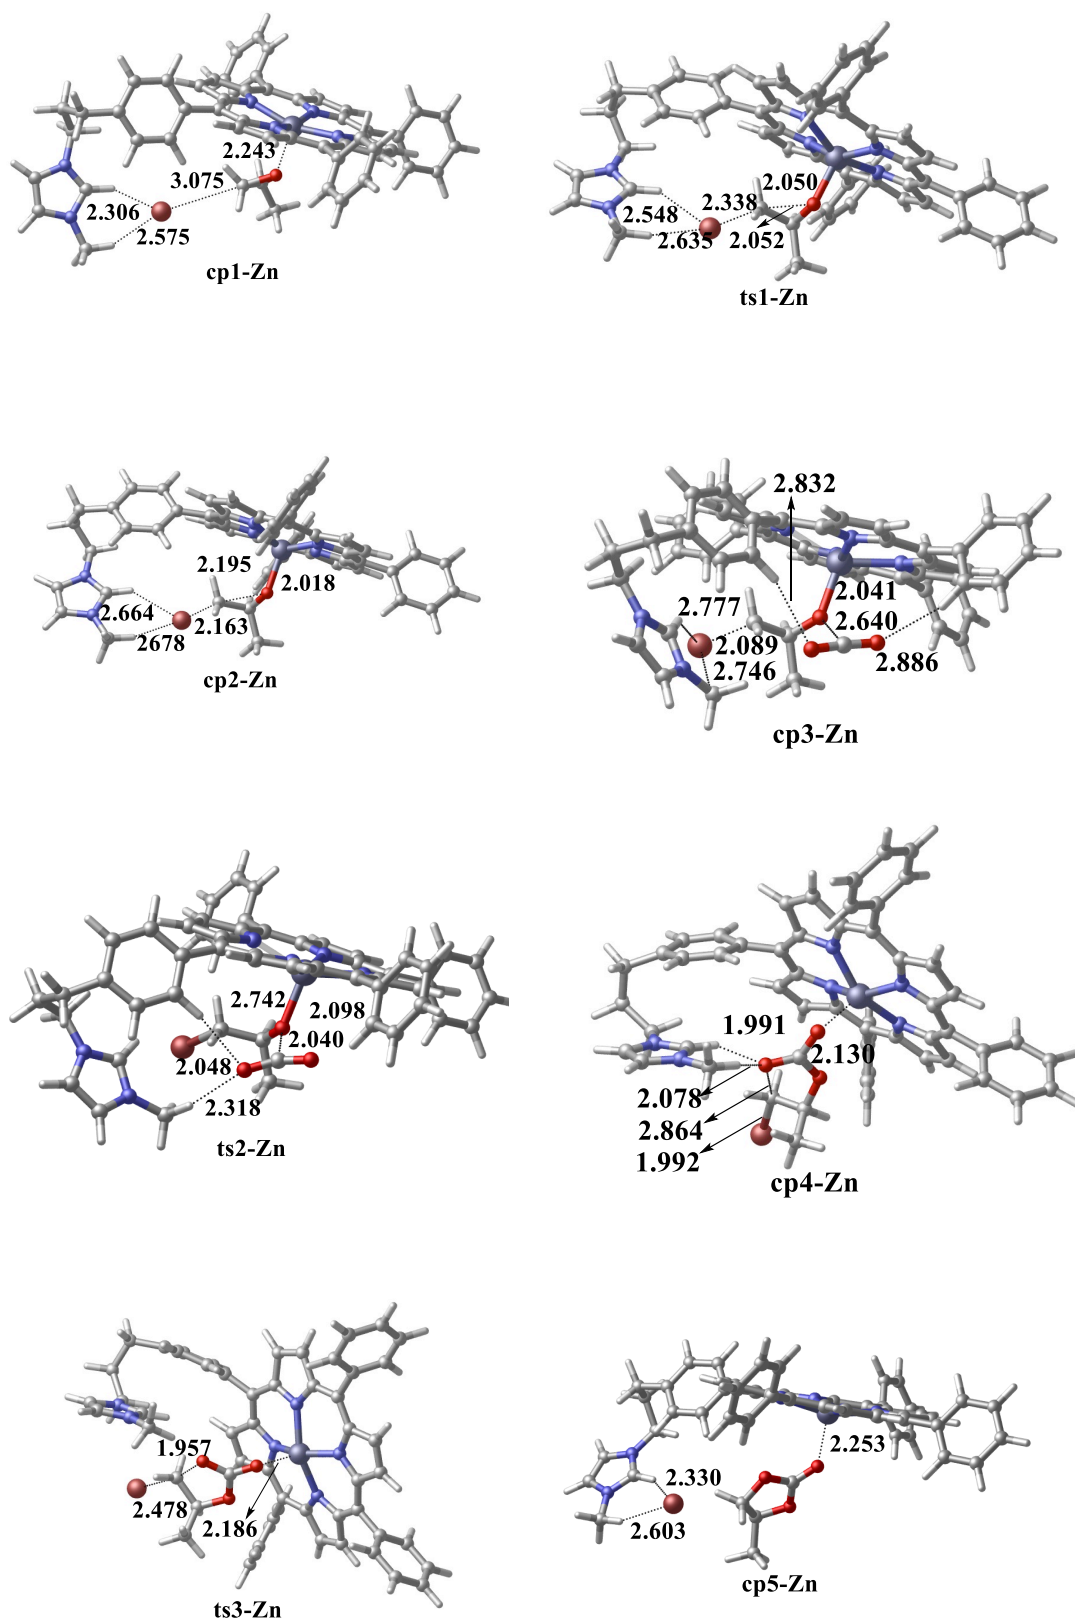

**Fig. S1** Optimized structures (bonds in Å) of species for the cycloaddition reaction of CO<sub>2</sub> and PO catalyzed by IL-Zn(TPP) and the Zn as the catalytic center.

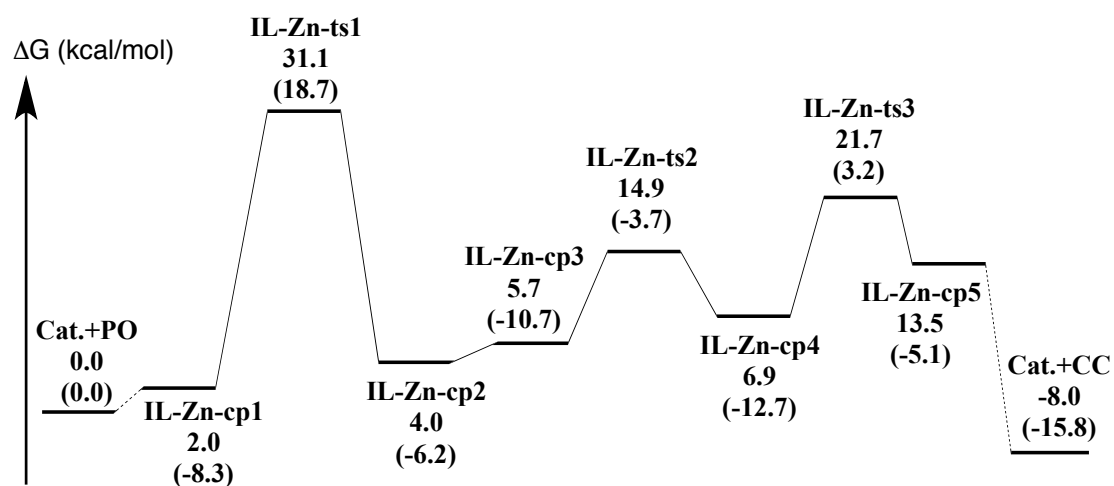

**Fig. S2** Predicted relative free energy profile and electronic energies (in parentheses) for the cycloaddition reaction of CO<sub>2</sub> and PO catalyzed by IL-Zn(TPP) and the imidazole as the catalytic center.

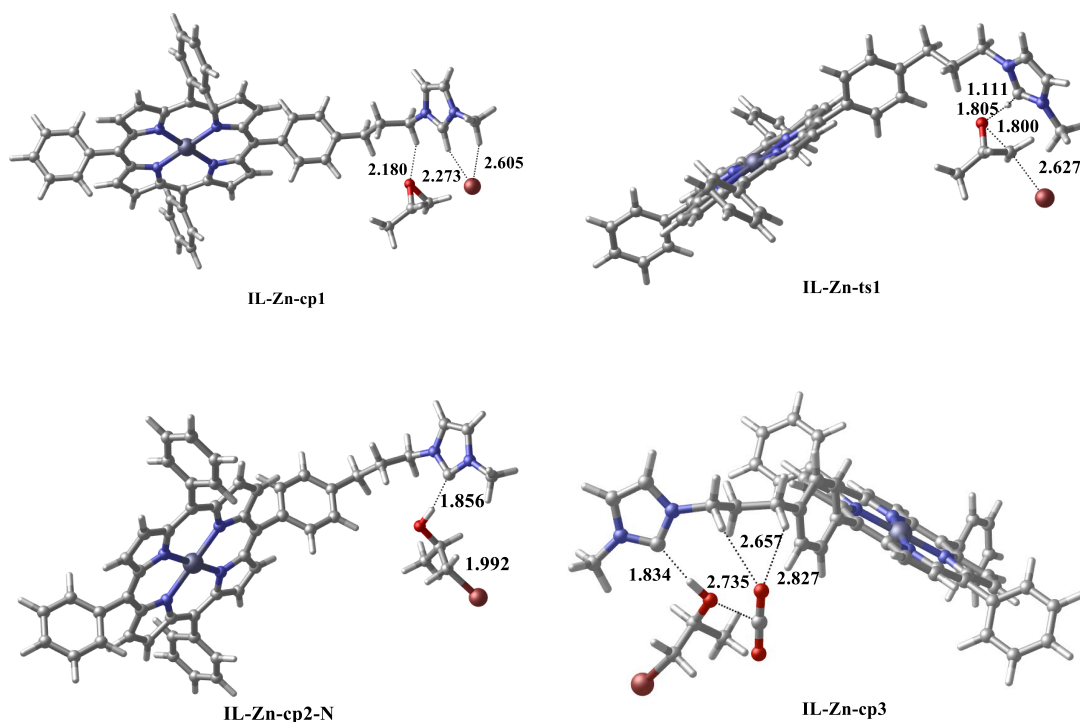

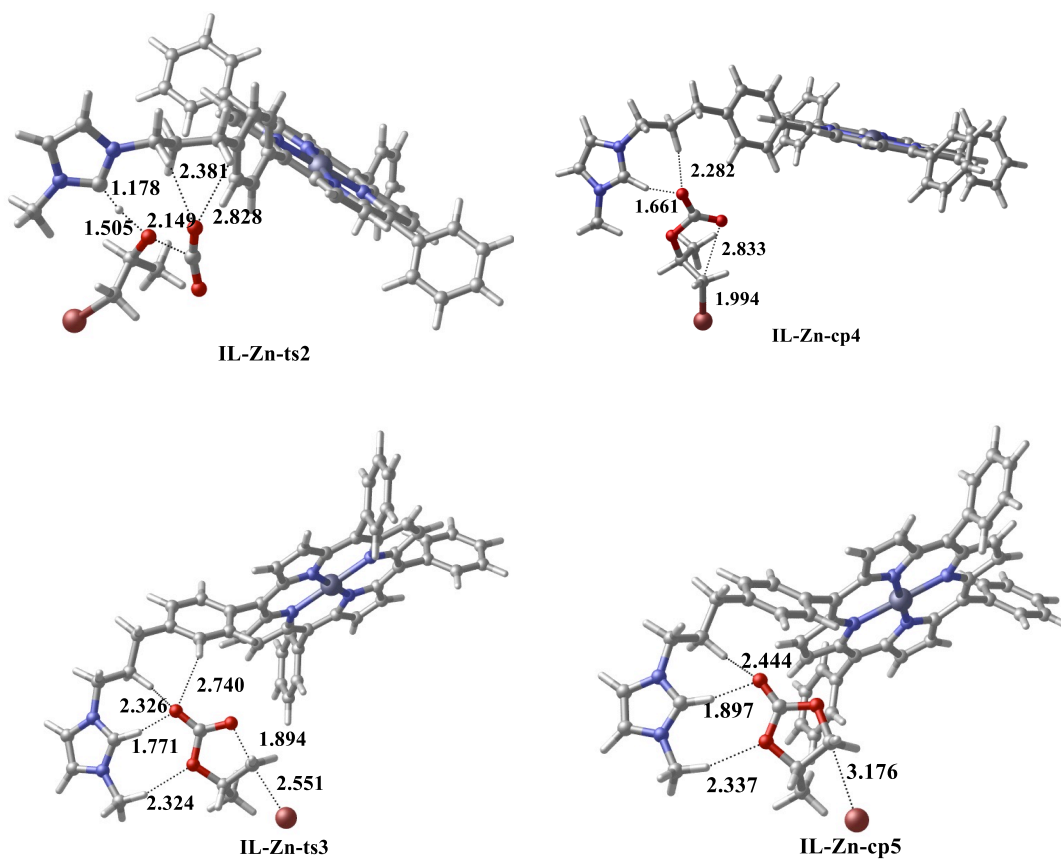

**Fig. S3** Optimized structures (bonds in Å) of species for the cycloaddition reaction of CO<sub>2</sub> and PO catalyzed by IL-Zn(TPP) and the imidazole as the catalytic center.

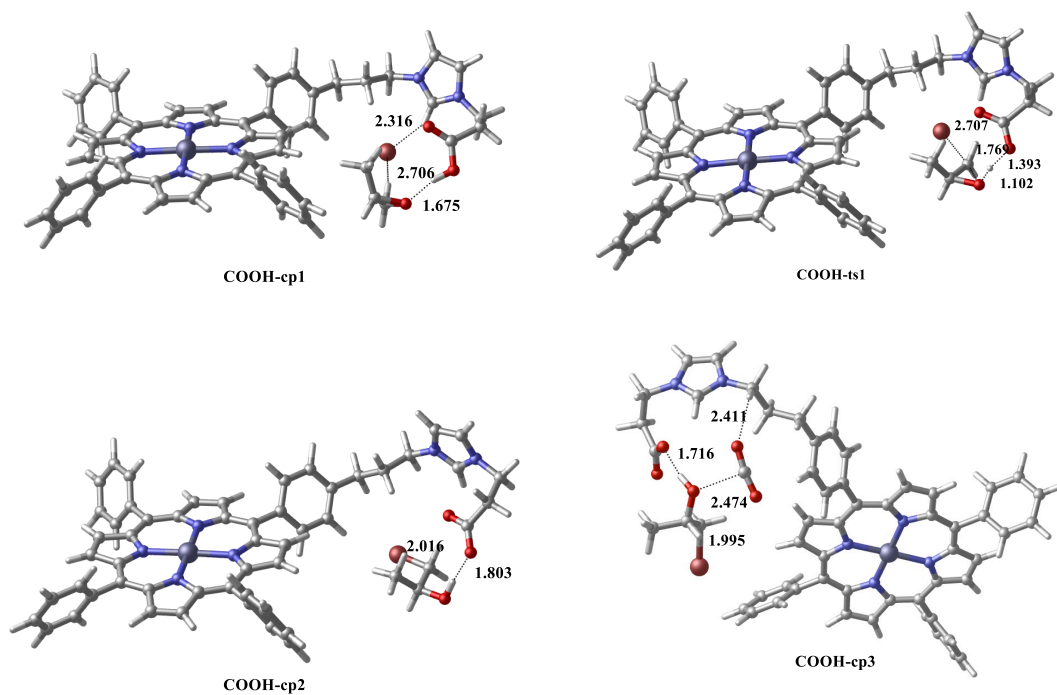

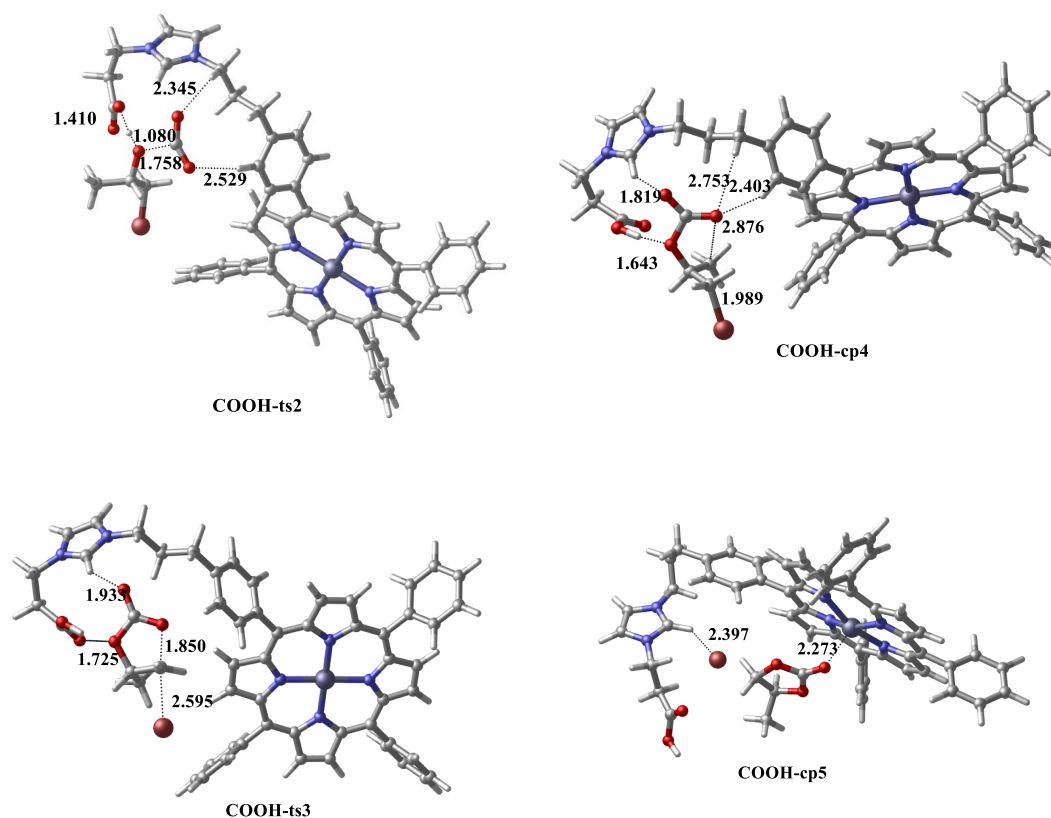

**Fig. S4** Optimized structures (bonds in Å) of species for the cycloaddition reaction of CO<sub>2</sub> and PO catalyzed by IL-Zn(TPP) and the COOH group as the catalytic center.

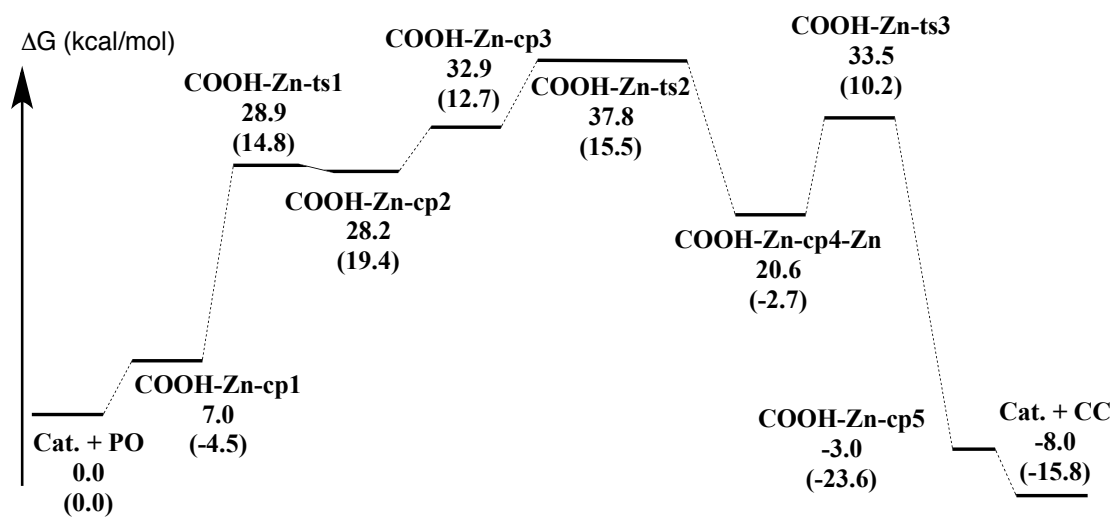

**Fig. S5** Predicted relative free energy profile and electronic energies (in parentheses) for the cycloaddition reaction of CO<sub>2</sub> and PO catalyzed by the metalloporphyrin moiety of COOH-IL-Zn(TPP).

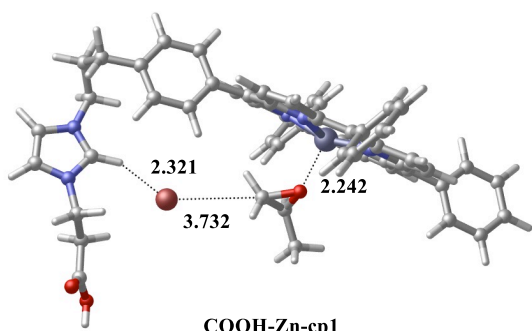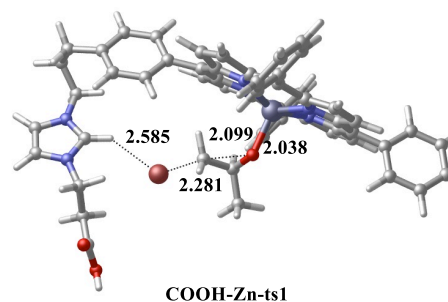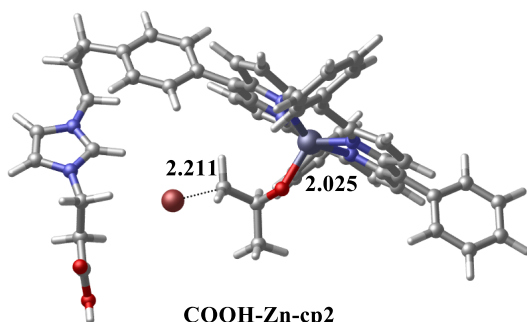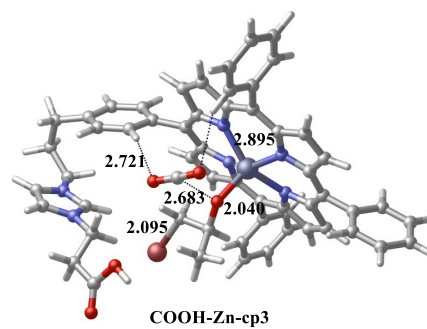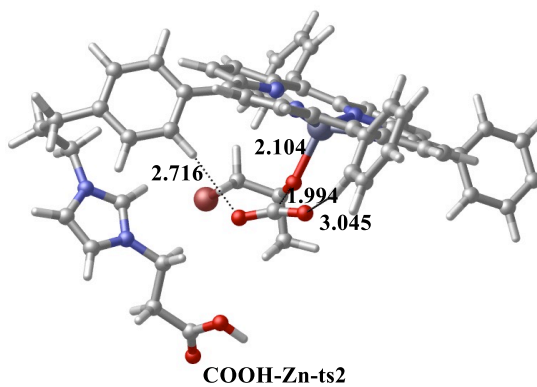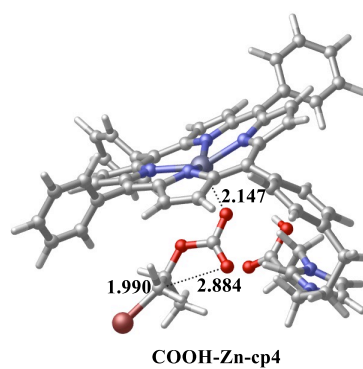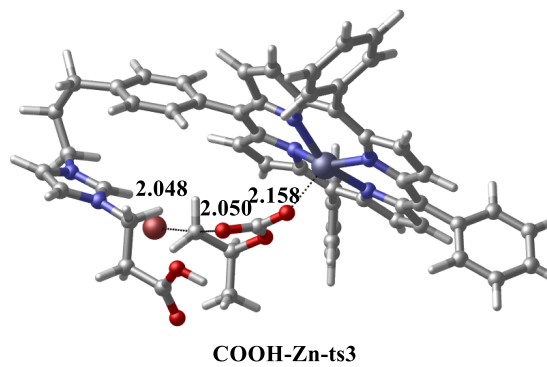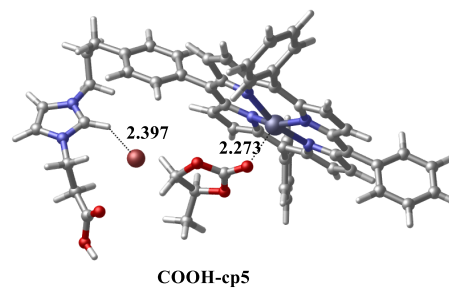

**Fig. S6** Optimized structures (bonds in Å) of species for the catalytic cycloaddition reaction of CO<sub>2</sub> and PO by COOH-IL-Zn(TPP).

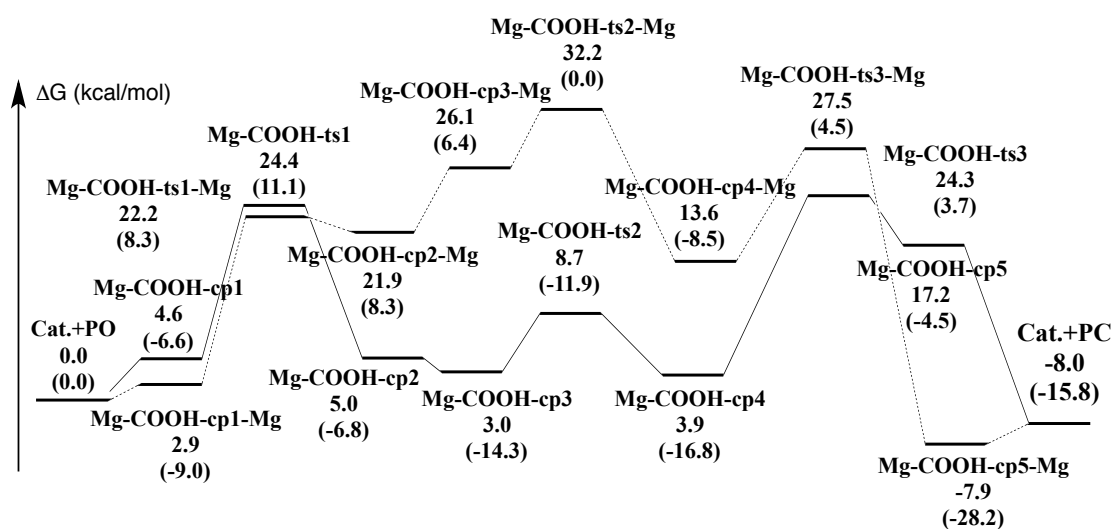

**Fig. S7** Predicted relative free energy profile and electronic energies (in parentheses) for the catalytic cycloaddition reaction of CO<sub>2</sub> and PO by COOH-IL-Mg(TPP).

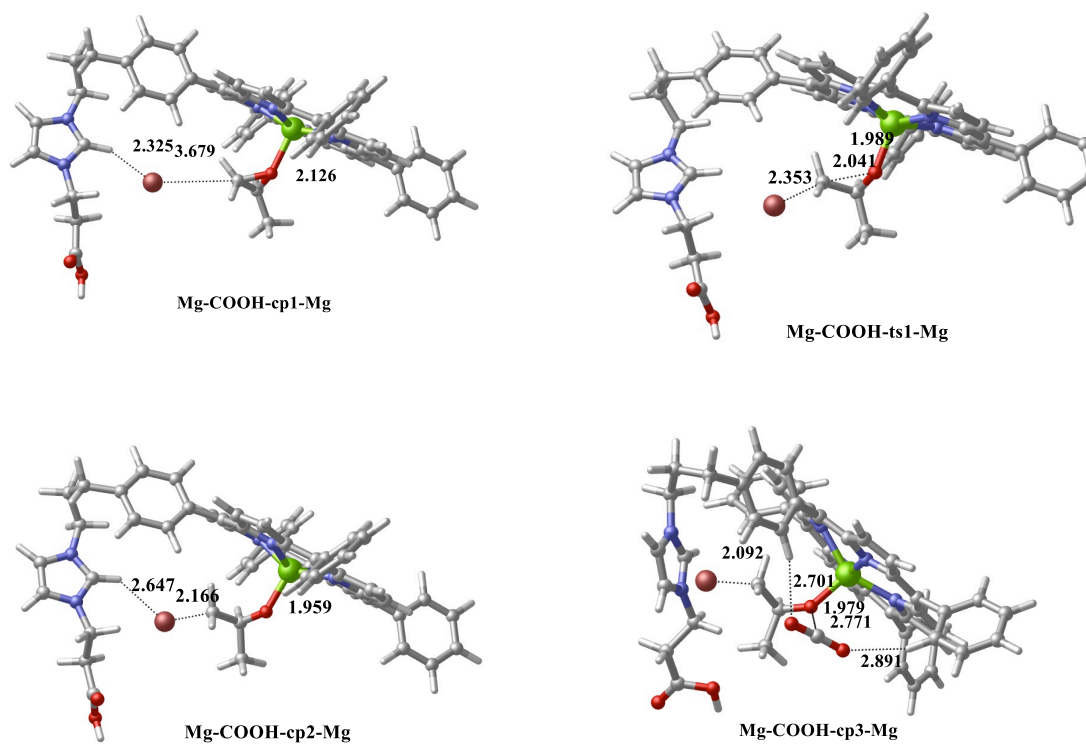

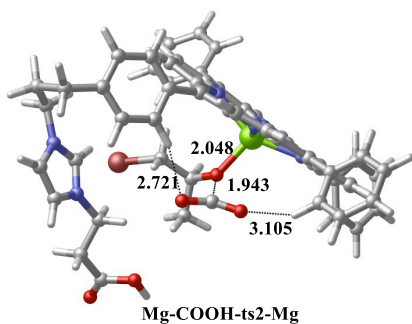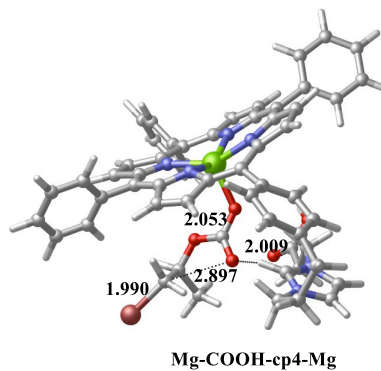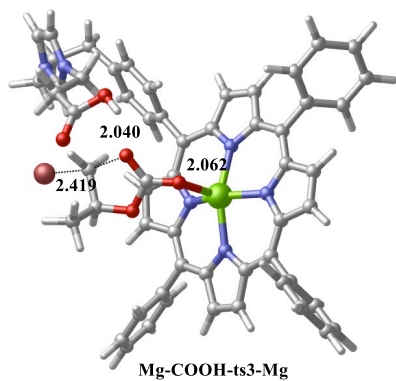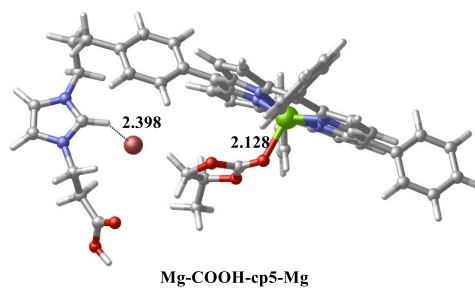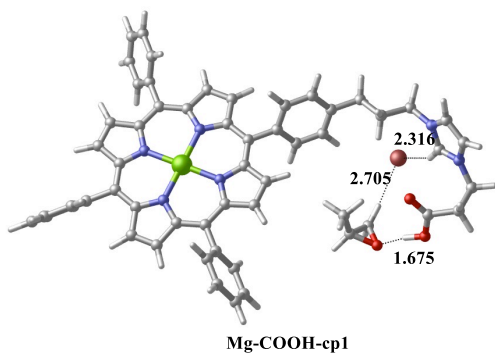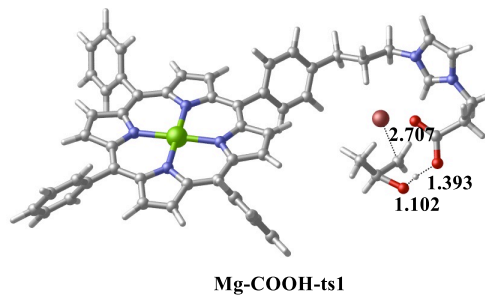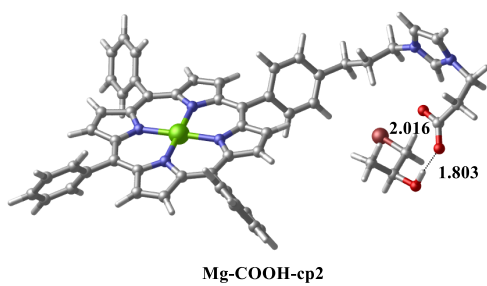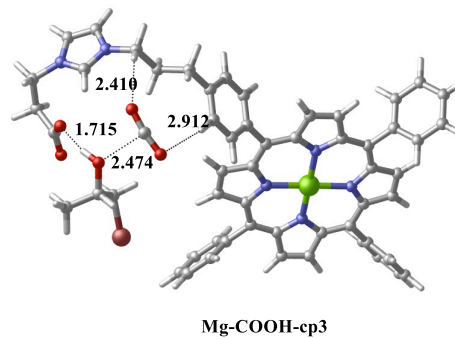



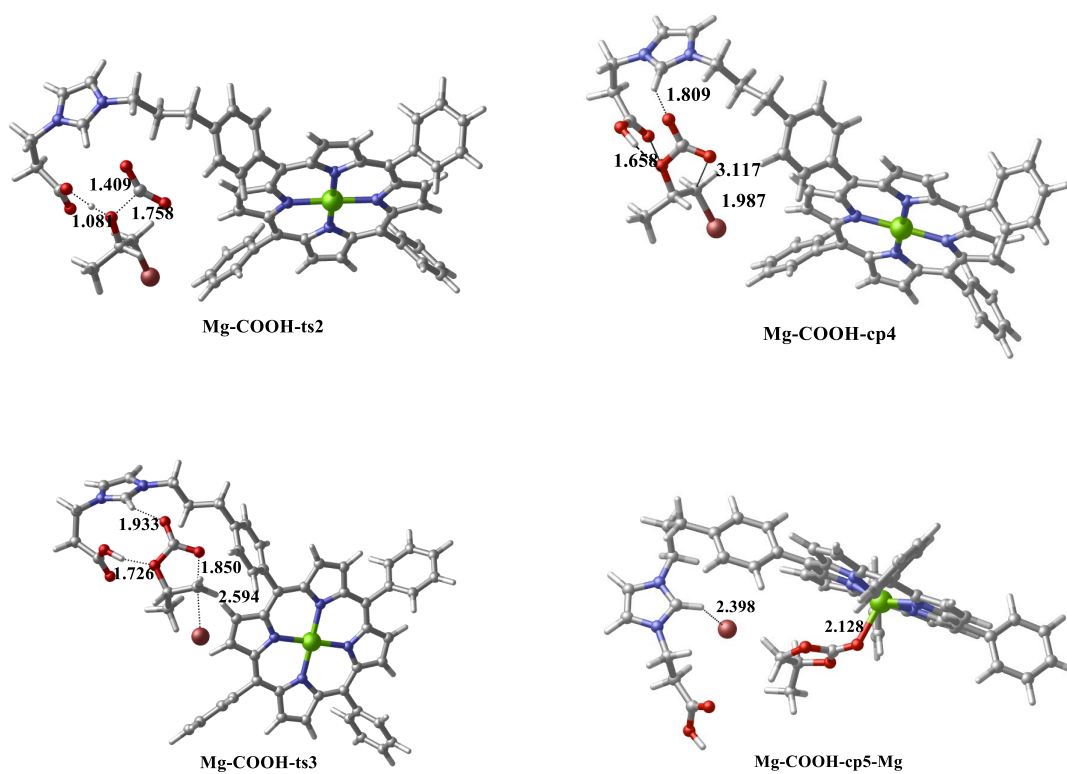

**Fig. S8** Optimized structures (bonds in Å) of species for the catalytic cycloaddition reaction of CO<sub>2</sub> and PO by COOH-IL-Mg(TPP).

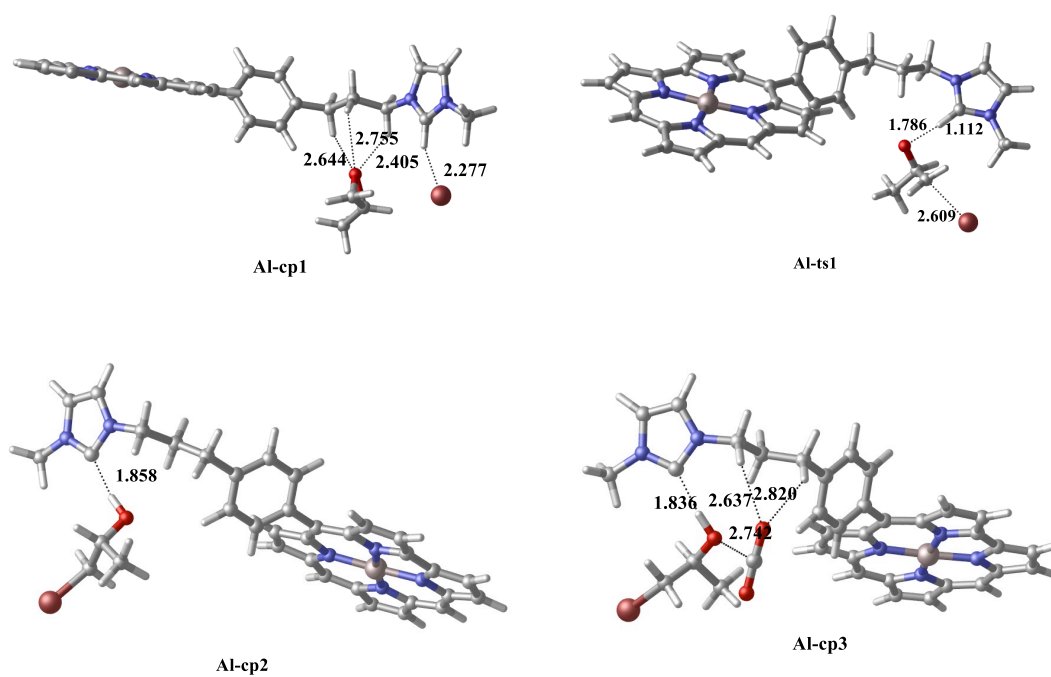

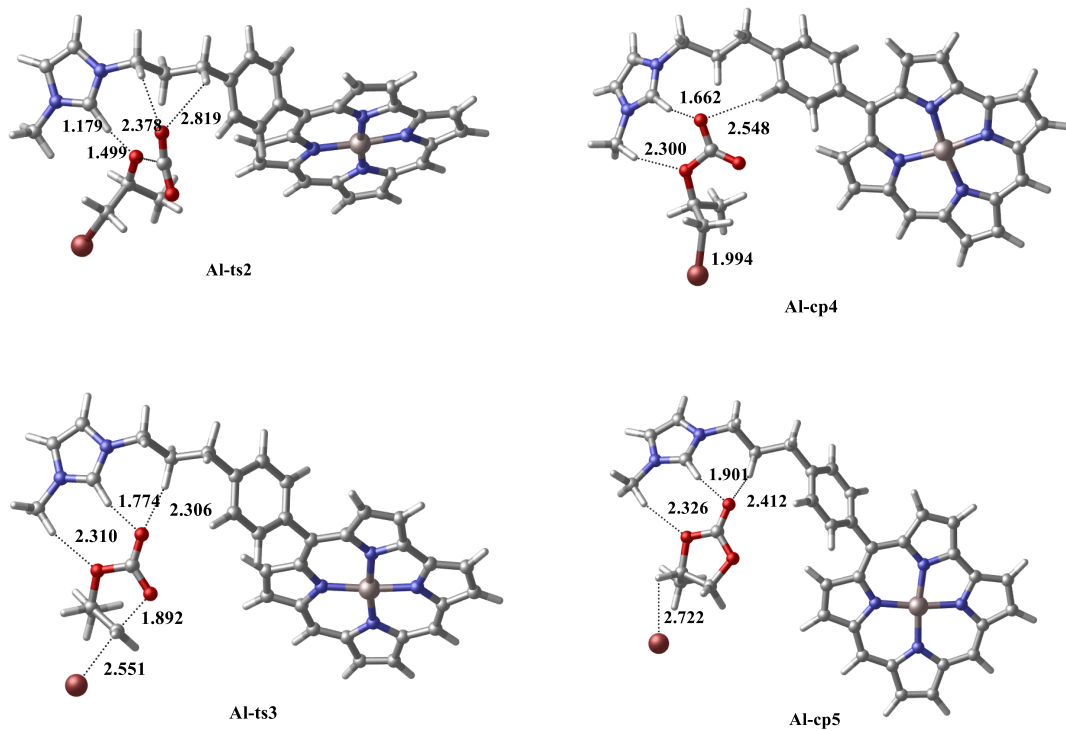

**Fig. S9** Optimized structures (bonds in Å) of species involved in the catalytic cycloaddition reaction of CO<sub>2</sub> and PO by the IL moiety of IL-Al(Cor).

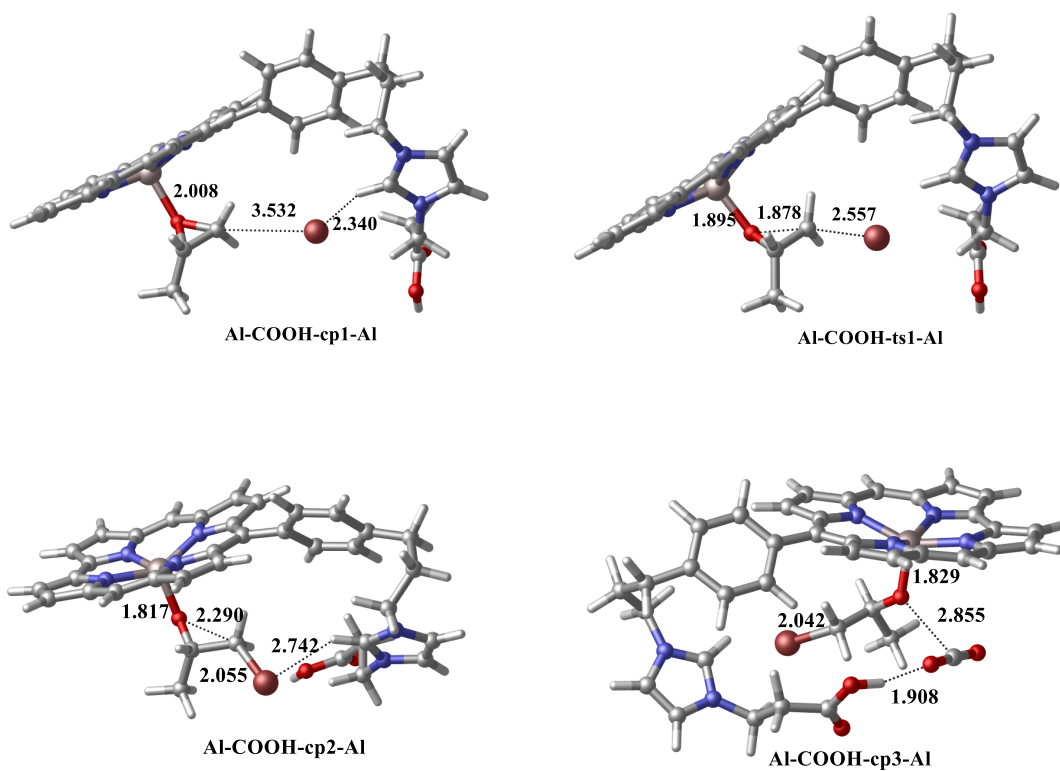

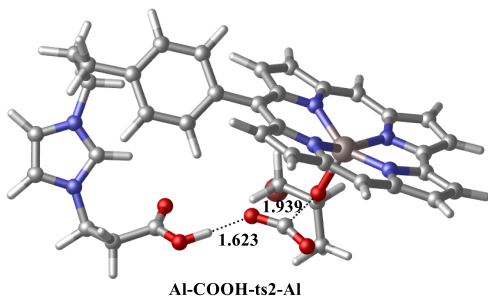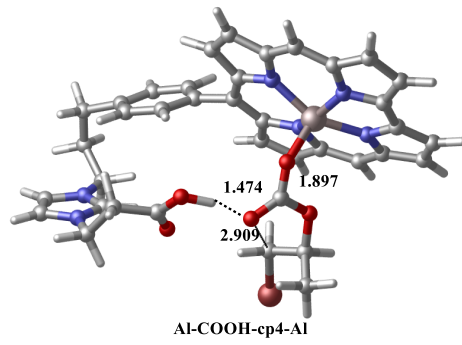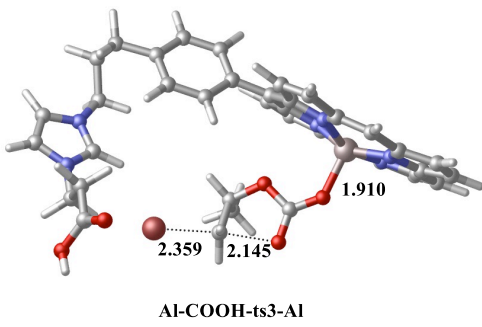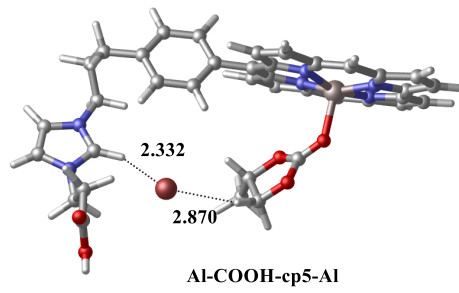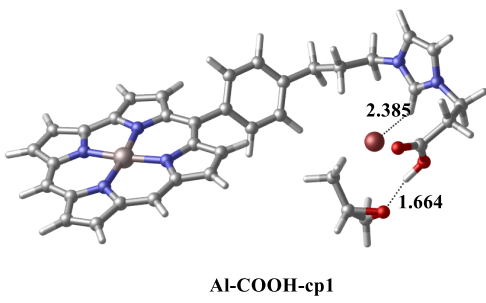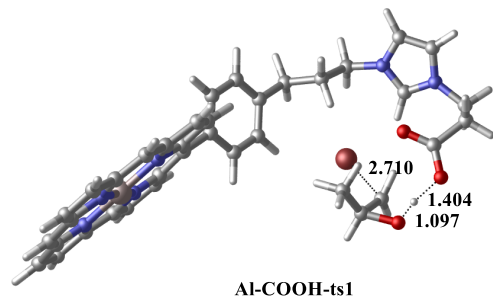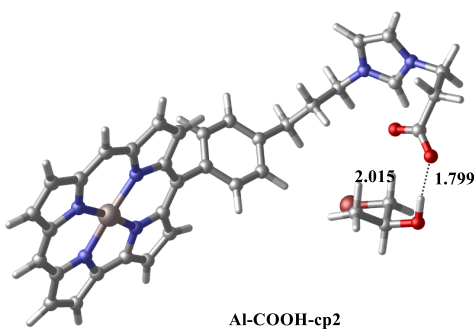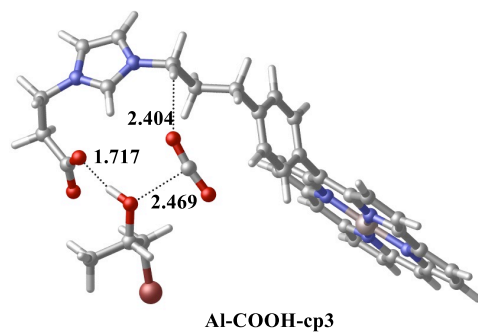

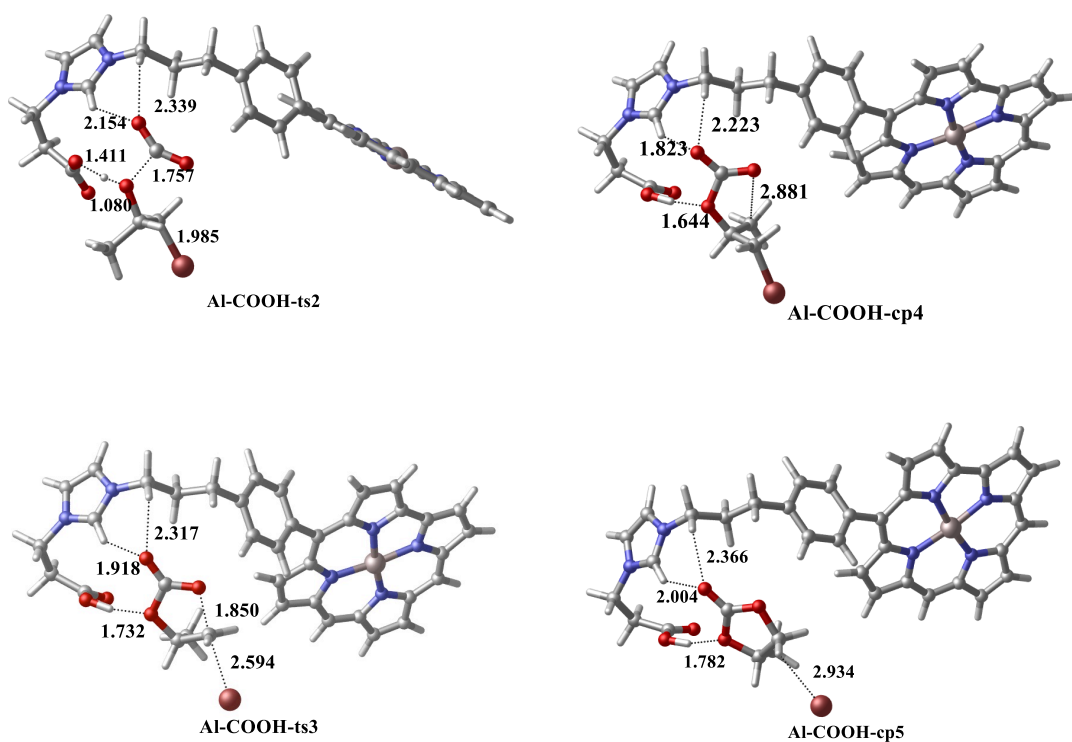

**Fig. S10** Optimized structures (bonds in Å) of species for the catalytic cycloaddition reaction of CO<sub>2</sub> and PO by COOH-IL-Al(Cor).

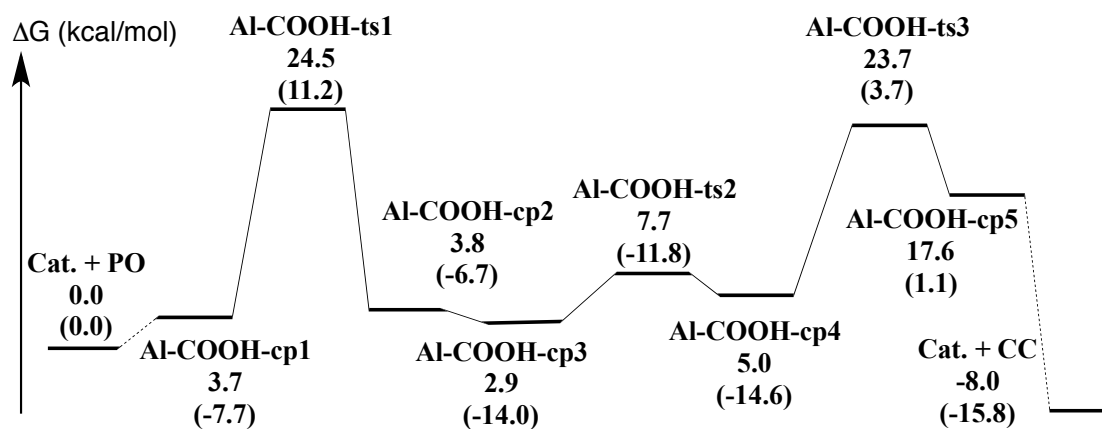

**Fig. S11** Predicted relative free energy profile and electronic energies (in parentheses) for the catalytic cycloaddition reaction of CO<sub>2</sub> and PO by the IL moiety of COOH-IL-Al(Cor).

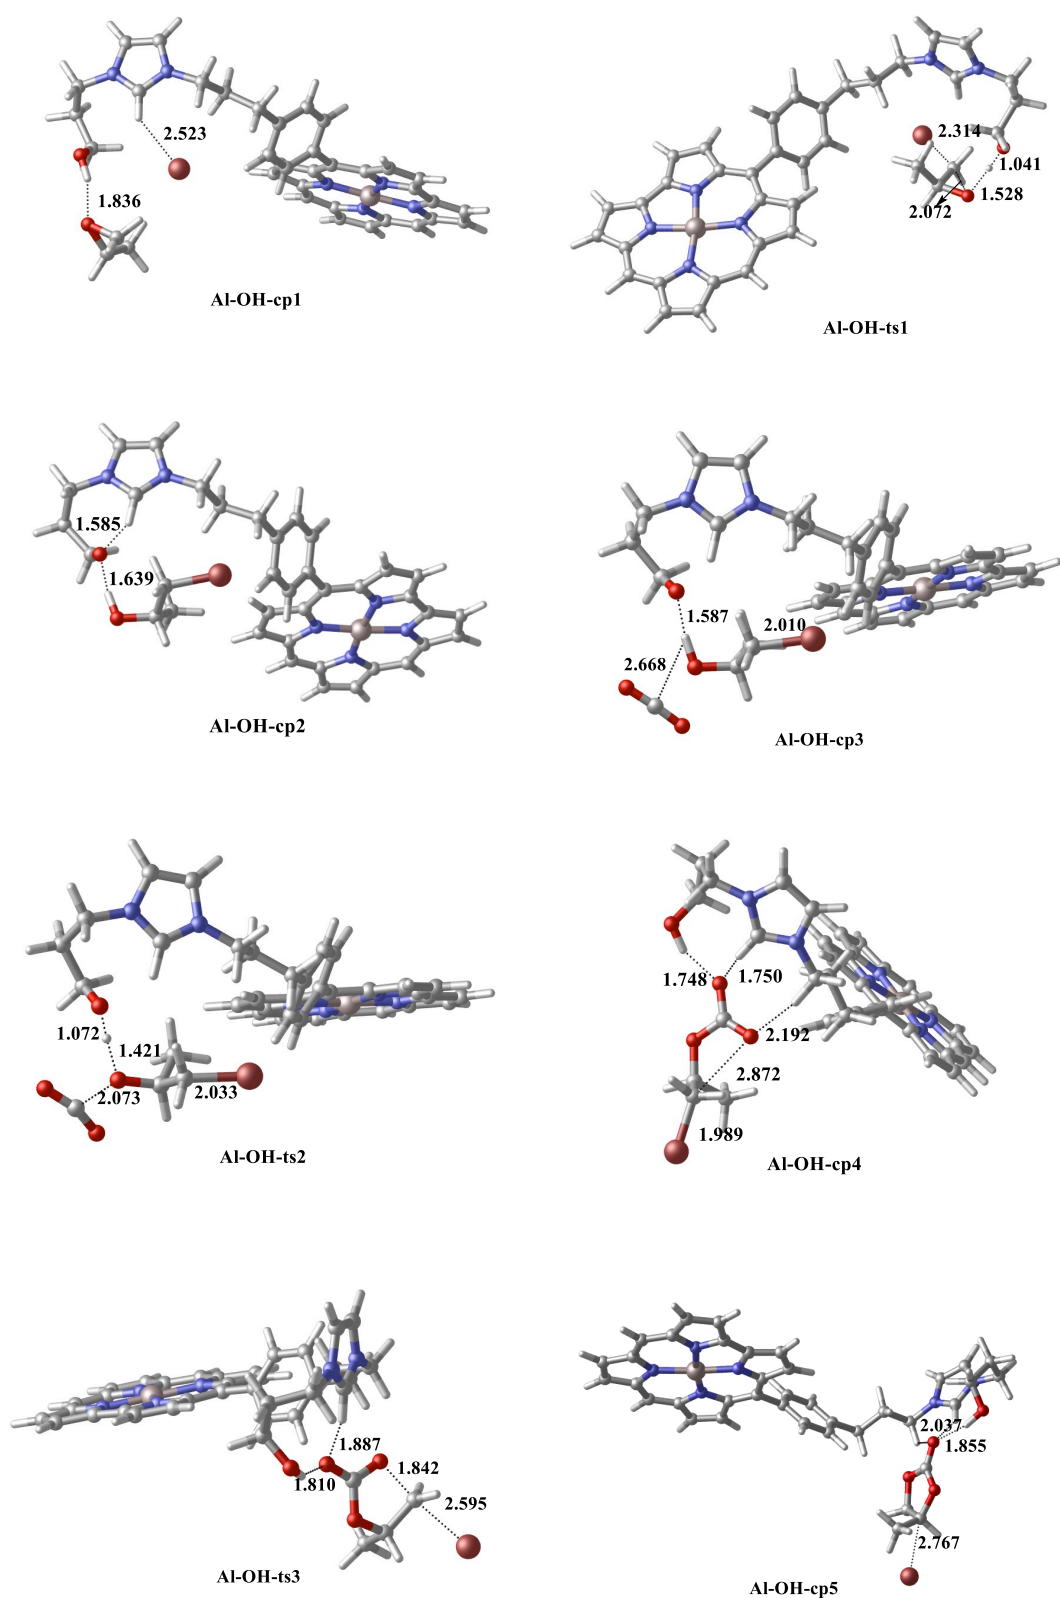

**Fig. S12** Optimized structures (bonds in Å) of species for the catalytic cycloaddition reaction of CO<sub>2</sub> and PO by the IL moiety of OH-IL-Al(Cor).

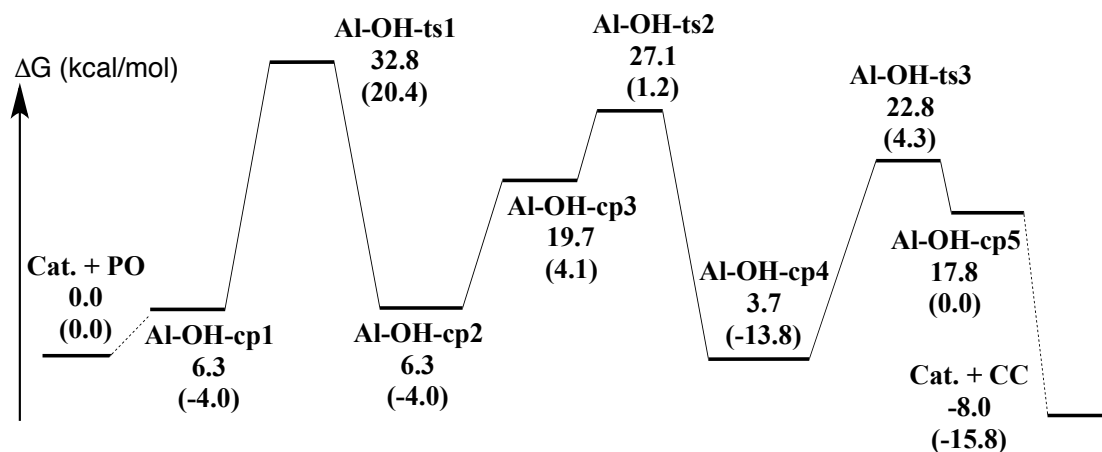

**Fig. S13** Predicted relative free energy profile and electronic energies (in parentheses) for the catalytic cycloaddition reaction of CO<sub>2</sub> and PO by the IL moiety of OH-IL-Al(Cor).
